# Supplementary material
Source: Elsevier journal article supplement (https://www.sciencedirect.com/science/article/pii/S0213911123000067)
Supplement: mmc1 [file S0213911123000067:mmc1.doc]

# Anexo

Los sistemas de ecuaciones en diferencias finitas que se han utilizado para modelar las distintas estrategias de vacunación se muestran a continuación.

**No vacunación:**


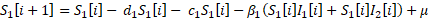


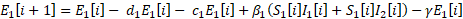


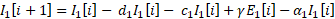


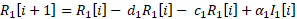


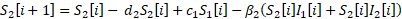


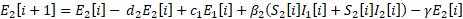


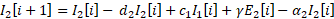


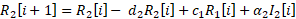


**Con vacuna 1 dosis:**

**Con vacuna 2 dosis:**

Donde:

- i es el momento de tiempo medido en semanas.
- Sj[i], Ej[i], Ij[i], Rj[i] representan el número de susceptibles, expuestos, infectivos y recuperados del grupo de edad j (j = 1: individuos menores de 1 año; j = 2: individuos de 1 o más años).
- V21d[i]y V22d[i] hace referencia a los estados de vacuna con una dosis y dos dosis respectivamente.

| **Tabla I**  Parámetros utilizados para el modelo dinámico | | | |
| --- | --- | --- | --- |
| **Parámetro** | **Descripción** | **Valor** | **Referencia** |
|  | Tasa de crecimiento (tasa de transferencia de personas del grupo 1 al grupo 2) | 0,018 | Estimadoa |
|  | Tasa de mortalidad del grupo j | 2,37E-5a | Estimado a partir de los datos del INE |
|  | Periodo de recuperación del grupo j | 39 días | Valenzuela et al.1 |
|  | Tasa efectiva de contagiob del grupo j | 4,6E-08; 8,6E-09 | Obtenido al ajustar el modelo |
| µ | Tasa de nacimiento | 391.930 (niños por año) | Estimado a partir de los datos del INE |
|  | Periodo de latencia | 2 semanas | Bauch et al.2 |
|  | Cobertura de la primera dosis/segunda dosis | 96,7/94,7% | Supuesto a partir de las tasas de cobertura de 2016 publicadas por el MSCBS sobre la vacuna infantil SRP en España3 |
|  | Duración máxima de la eficacia de la vacuna si solo se administra 1 dosis/2 dosis | 10/14 años | Ott et al.4 |
|  | Efectividad de la vacuna con 1 dosis/2 dosis | 90/99% | Werzberger et al.5, Innis et al.6 |
|  | Tiempo transcurrido entre la primera y la segunda dosis | 6 meses | Supuesto |
| INE: Instituto Nacional de Estadística; MSCBS: Ministerio de Sanidad, Consumo y Bienestar Social; SRP: sarampión-rubeola-parotiditis.  aCalculado a partir de los datos del INE y de la resolución de las ecuaciones en diferencias finitas de tal manera que la población se mantuviera constante a lo largo del tiempo.  bUn contacto entre un susceptible y un infectivo se dice que es efectivo si dicho contacto desemboca en infección del susceptible7. | | | |

# Bibliografía

1. Valenzuela MT, Jacobs RJ, Arteaga O, et al. Cost-effectiveness of universal childhood hepatitis A vaccination in Chile. Vaccine. 2005;23:4110-9.
2. Bauch CT, Anonychuk AM, Pham BZ, et al. Cost-utility of universal hepatitis A vaccination in Canada. Vaccine. 2007;25:8536-48.
3. Ministerio de Sanidad. Coberturas de vacunación de sarampión, rubeola y parotiditis y de virus de papiloma humano (VPH). España 2008-2016. Disponible en: https://www.mscbs.gob.es/profesionales/saludPublica/prevPromocion/vacunaciones/coberturas.htm
4. Ott JJ, Irving G, Wiersma ST. Long-term protective effects of hepatitis A vaccines. A systematic review. Vaccine. 2012;31:3-11.
5. Werzberger A, Mensch B, Kuter B, et al. A controlled trial of a formalin-inactivated hepatitis A vaccine in healthy children. N Engl J Med. 1992;327:453-7.
6. Innis BL, Snitbhan R, Kunasol P, et al. Protection against hepatitis A by an inactivated vaccine. JAMA. 1994;271:1328-34.
7. Abbey H. An examination of the Reed Frost theory of epidemics. Hum Biol. 1952;24:201-33.
